# Supplementary material for: Early and recurrent cerebral vasospasms after aneurysmal subarachnoid hemorrhage: The impact of age
Source: PubMed Central journal article supplement (PMC10916818; doi:10.1177/23969873231209819), 2023-11-01
Supplement: sj-pdf-1-eso-10.1177_23969873231209819.pdf [file sj-pdf-1-eso-10.1177_23969873231209819.pdf]

Supplementary Material

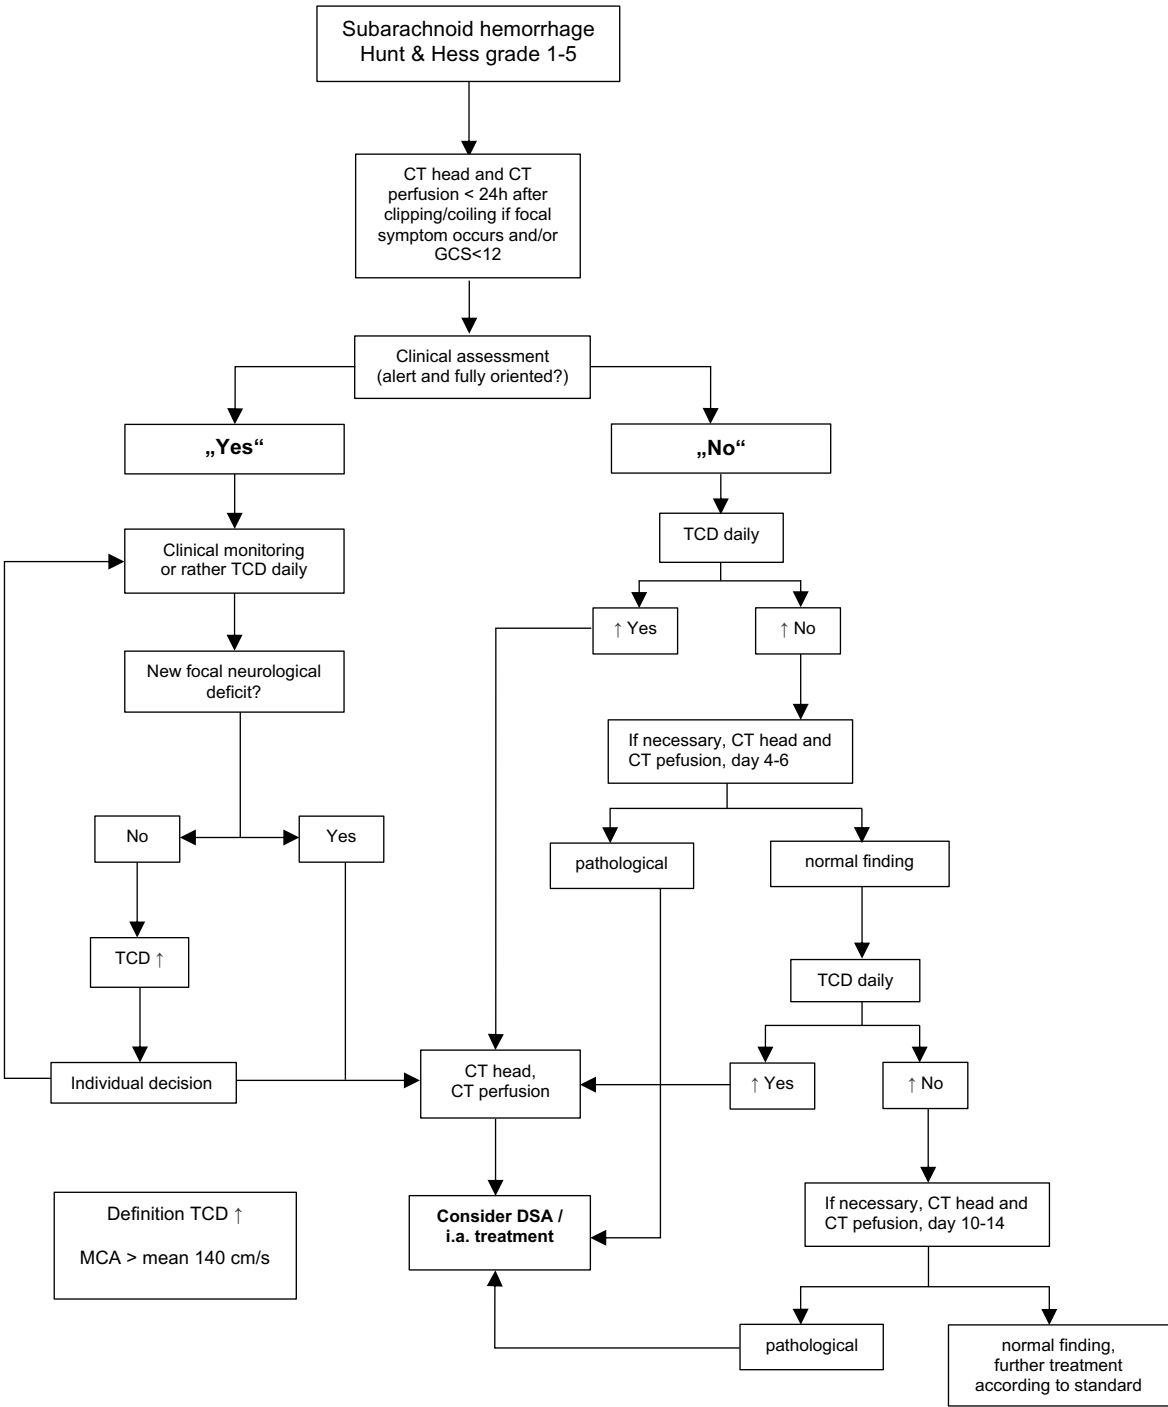

Suppl. Figure 1. Local protocol of diagnostic algorithm for detection of relevant vasospasms after subarachnoid hemorrhage.

CT computed tomography, DSA digital subtraction angiography, GCS Glasgow Coma Scale, MCA middle cerebral artery, TCD transcranial Doppler

| Variables                          | Model 1      |                      |              | Model 2      |                      |              | Model 3       |                       |                  |
|------------------------------------|--------------|----------------------|--------------|--------------|----------------------|--------------|---------------|-----------------------|------------------|
|                                    | OR           | 95% CI               | P Value      | OR           | 95% CI               | P Value      | Coefficients  | 95% CI                | P Value          |
| Age (years)                        | <b>0.976</b> | <b>0.957 - 0.995</b> | <b>0.014</b> | <b>0.949</b> | <b>0.914 - 0.985</b> | <b>0.006</b> | <b>-0.109</b> | <b>-0.17 - 0.048</b>  | <b>&lt;0.001</b> |
| Sex (female)                       | 1.446        | 0.872 - 2.398        | 0.15         | 0.563        | 0.246 - 1.290        | 0.174        | -0.948        | -2.407 - 0.51         | 0.20             |
| Hypertension                       | 0.69         | 0.42 - 1.133         | 0.14         | 1.095        | 0.489 - 2.449        | 0.826        | 0.565         | -0.834 - 1.965        | 0.43             |
| Diabetes m. (yes)                  | 1.002        | 0.140 - 7.146        | 1.00         | -            | -                    | -            | -2.577        | -10.248 - -5.095      | 0.51             |
| Smoking (yes)                      | 0.755        | 0.459 - 1.244        | 0.27         | 1.705        | 0.734 - 3.958        | 0.215        | -0.161        | -1.623 - 1.301        | 0.83             |
| ICH at admission (yes)             | <b>1.78</b>  | <b>1.022 - 3.087</b> | <b>0.04</b>  | 0.789        | 0.328 - 1.90         | 0.598        | 0.102         | -1.431 - 1.634        | 0.90             |
| EVD (yes)                          | 0.555        | 0.291 - 1.057        | 0.07         | 1.070        | 0.367 - 3.119        | 0.901        | 0.662         | -1.244 - 2.568        | 0.49             |
| Hunt & Hess grade (increasing)     | 1.088        | 0.883 - 1.340        | 0.43         | 1.129        | 0.808 - 1.577        | 0.477        | -0.114        | -0.704 - 0.476        | 0.70             |
| modified Fisher grade (increasing) | 1.170        | 0.904 - 1.513        | 0.23         | 0.847        | 0.554 - 1.297        | 0.446        | 0.367         | -0.371 - 1.105        | 0.33             |
| Treatment modality (Clip)          | 0.755        | 0.47 - 1.416         | 0.47         | 1.648        | 0.694 - 3.917        | 0.258        | -1.038        | -2.506 - 0.43         | 0.16             |
| Onset of relevant vasospasms       | na           |                      |              | na           |                      |              | <b>-0.255</b> | <b>-0.432 - 0.077</b> | <b>0.005</b>     |
| Constant                           | -            | -                    | -            | -            | -                    | -            | 12.100        | 2.126                 | <0.001           |

Suppl. Figure 2. Binomial and multivariate regression models.

Boldface type indicates statistically significant values.

EVD external ventricular drain, ICH intracerebral hemorrhage

Model 1: Binomial logistic regression, dependent variable "occurrence of relevant vasospasms"

Model 2: Binomial logistic regression, dependent variable "occurrence of early relevant vasospasms"

Model 3: Linear regression, dependent variable "duration of relevant vasospasms"

NA: Not selected in the model
